# Supplementary material
Source: PubMed Central journal article supplement (PMC6223650)
Supplement: NIHMS1510248-supplement-1.pdf [file NIHMS1510248-supplement-1.pdf]

## Supplementary data

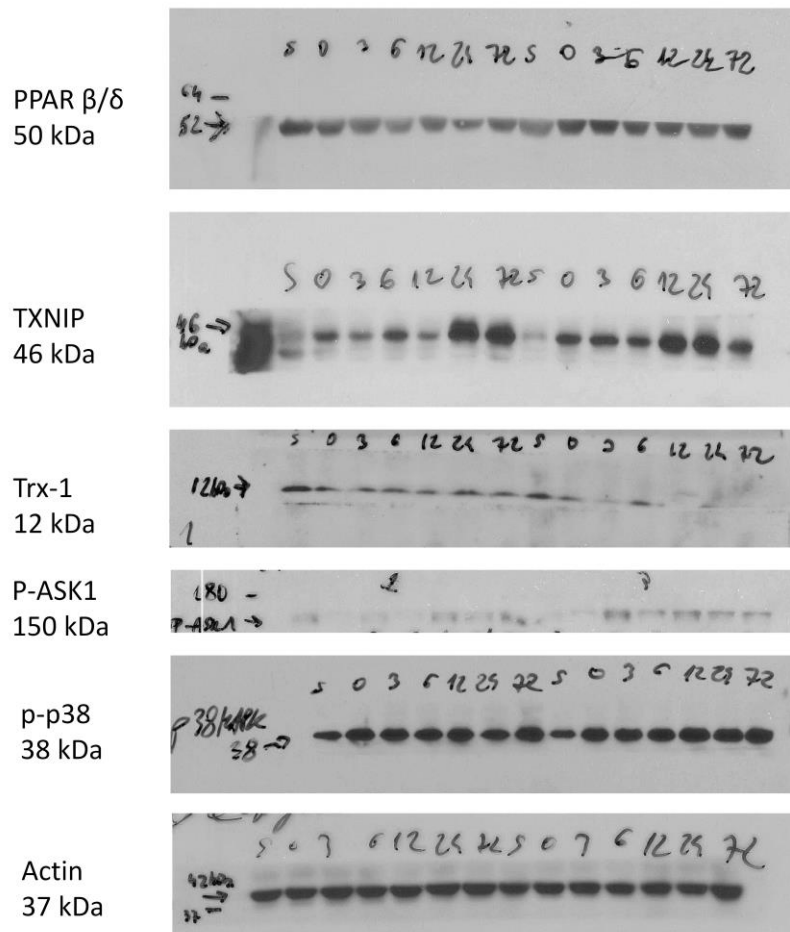

SUPPLEMENTARY FIGURE 1. Western blot membranes for time-course experiment.

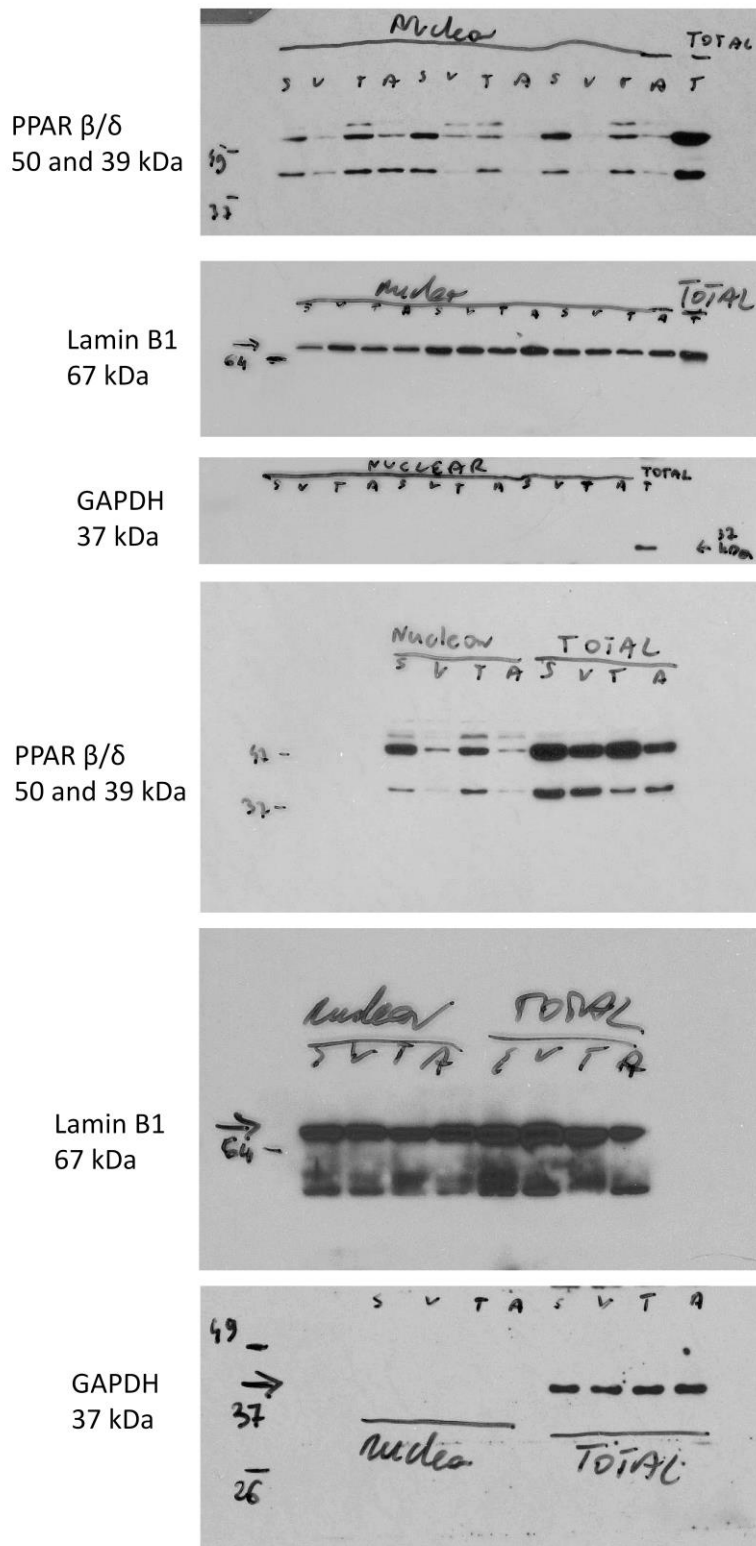

SUPPLEMENTARY FIGURE 2. Western blot membranes for nuclear/total fraction experiment.

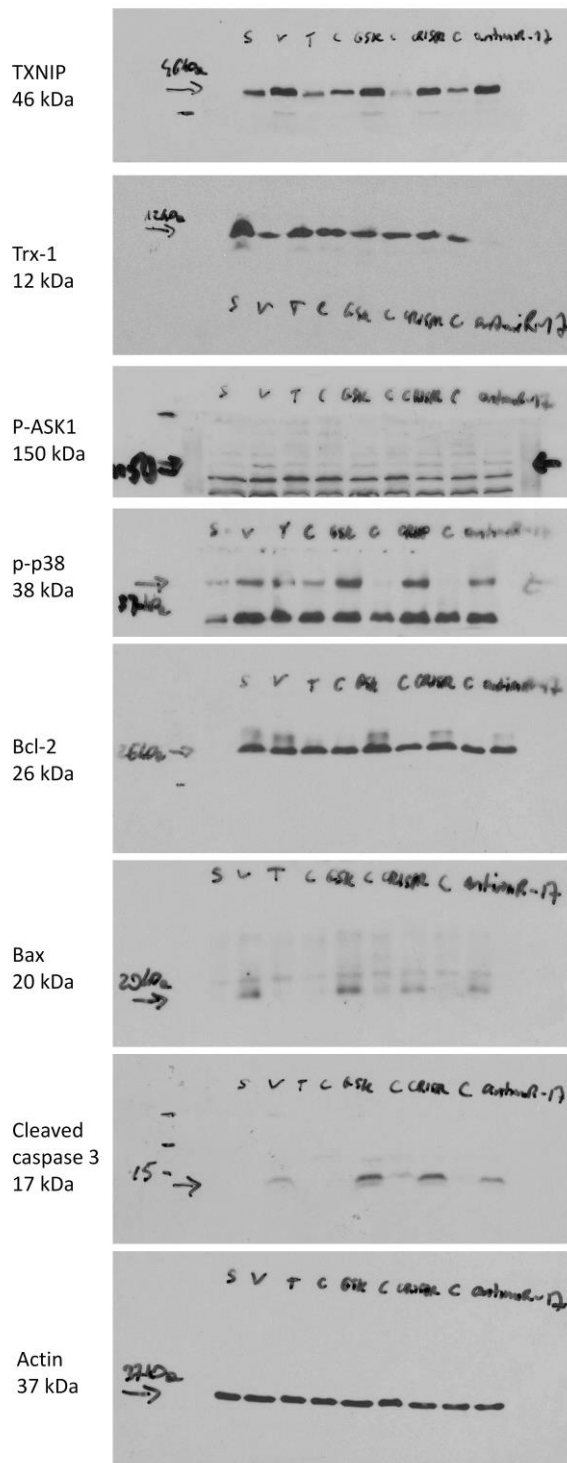

SUPPLEMENTARY FIGURE 3. Western blot membranes for mechanism study experiment.

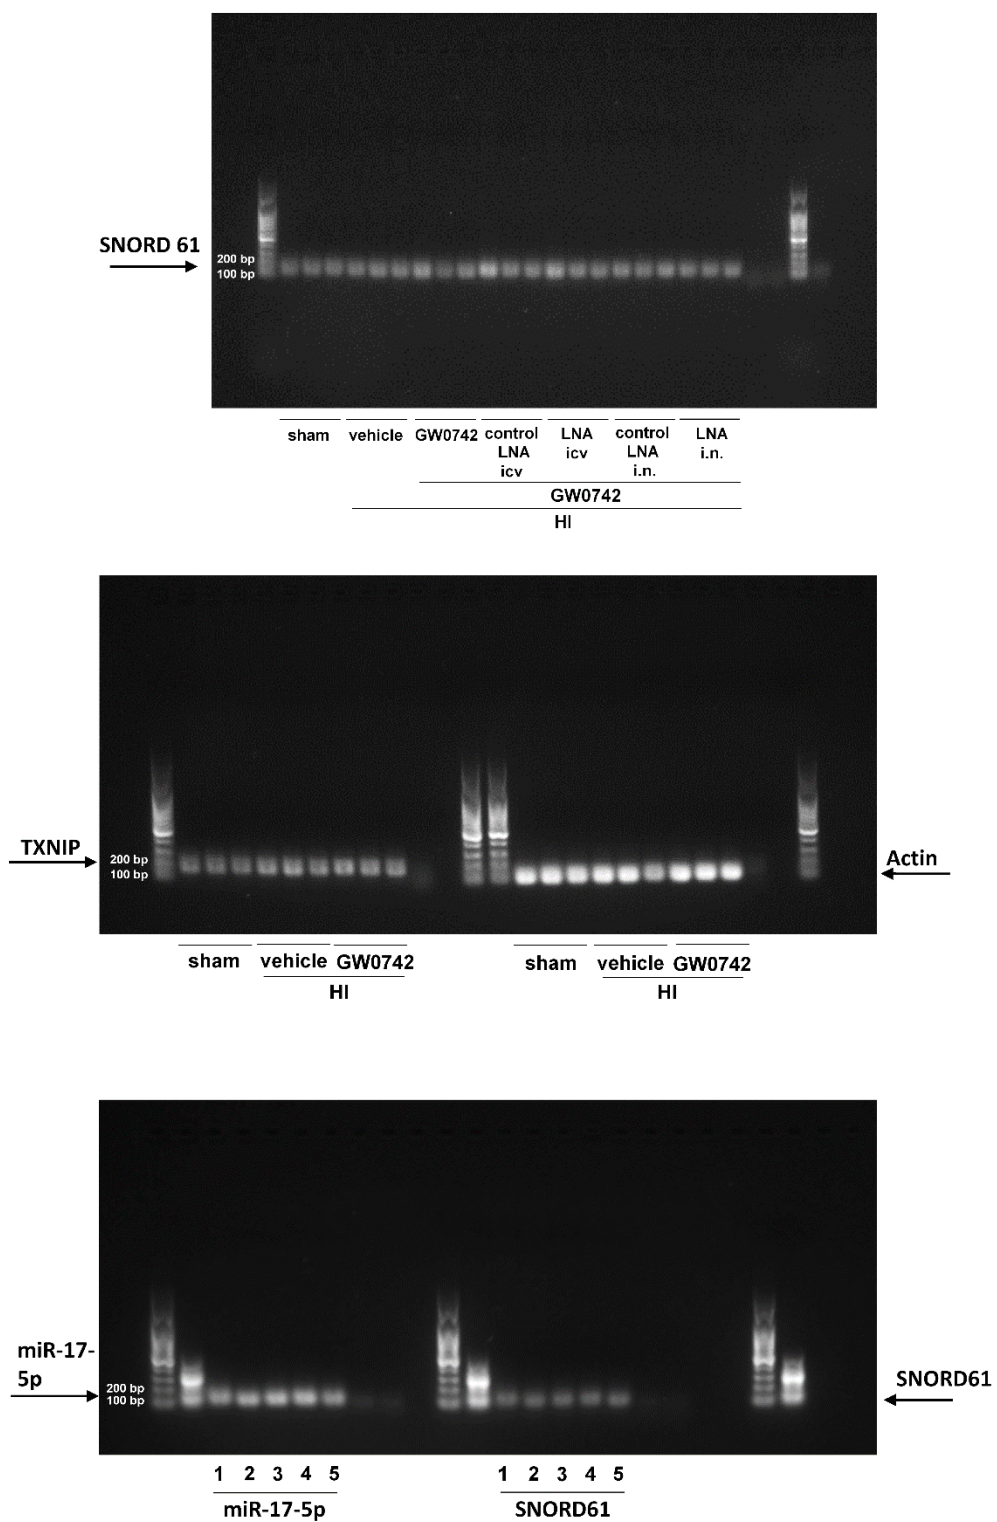

SUPPLEMENTARY FIGURE 4. Validation of PCR result showing electrophoresis of RT-qPCR products: miR-17, SNORD61, TXNIP and Actin. 1-sham, 2-HI+vehicle, 3-HI+GW0742, 4-HI+GW0742+control LNA icv, 5-HI+GW0742+LNA antimir-17-5p icv.
